# Supplementary material for: Snake Venomics and Antivenomics of Bothrops diporus, a Medically Important Pitviper in Northeastern Argentina
Source: Toxins (Basel). 2015 Dec 25;8(1):9. doi: 10.3390/toxins8010009 (PMC4728531; doi:10.3390/toxins8010009)
Supplement: Supplementary file 1 [file toxins-08-00009-s001.xlsx]

## Sheet: Hoja1
						TABLE S1
Summary of the MS/MS identification of the SDS-PAGE protein bands of B. diporus venom.
Assignment of the reverse-phase fractions from the venom of B. diporus, isolated as in Figure 1, to protein families by nESI-MS/MS collision-induced dissociation of peptide ions obtained by
nESI-MS/MS collision-induced dissociation of peptide ions obtained from in-gel digested protein bands separated by SDS-PAGE (insert in Figure 1). X = Ile or Leu; Mox, methionine sulphoxide.
Cysteine residues are carbamidomethylated. Apparent molecular masses (MW in kDa) were estimated by SDS-PAGE of non-reduced (■) and β-mercaptoethanol-reduced (▼) samples.
HPLC fraction	%	MW (kDa)	ESI-MS (ave) [Da]	m/z	z	Peptide sequence	Score	Best NCBI match	Protein family
1	1.113								np
2	0.83			459.5	1	ZHPP	de novo		BPP-like
3	2.553			444.4	1	ZBW	de novo		SVMPi
4	1.685			595.7	2	ZARPPHPPIPP	de novo		BPP
5	0.745			694.9	2	ZARPPHPPIPTPP	de novo		BPP like
6	1.027			547.1	2	ZARPPHPPIP	de novo		BPP-like
7	0.481			494	2	ZAPAVPEPPP	de novo		BPP-like
8	1.195			494	2	ZAPAVPEPPP	de novo		BPP-like
9	0.52			642.8	2	ZAPAVPEPPPQIGPP	de novo		BPP-like
10	1.288			686.3	2	(254.3)VNAPXNPSXPP	de novo		BPP
				642.9	2	(237.2)ADPRAPNIPP	de novo		BPP
11	7.059			551.9	2	ZGGQPTPQIPP	de novo		BPP
12	4.592	14 ▼	13823.1	418.7	2	VAAICFR	54	B. asper P86389	PLA2
				460.8	2	NLWQFGR	de novo	~ B. insularis P84397	PLA2
				744.9	2	(451.2)VHDCCYGK	de novo	~ B. insularis P84397	D49-PLA2
13	1.791	14 ▼	13683,5/13603,5/13823,1	443.9	3	MILQETGKNPAK	200	B. pauloensis 1PC9_A	PLA2
				702.8	2	TIVCGENNPCLK
				767.3	2	SYGAYGCNCGVLGR
				579.6	3	ELCECDKAVAICLR
				954.2	3	MoxILQETGKNPAKSYGAYGCNCGVLGR
14	1.395	14 ▼	13712,6/13587,5	702.8	2	TIVCGENNPCLK	601	B. pirajai P82287	PLA2
				767.3	2	SYGAYGCNCGVLGR
				549.9	3	DKTIVCGENNPCLK
				579.6	3	ELCECDKAVAICLR
				949.2	3	MILQETGKNPVTSYGAYGCNCGVLGR	161	B. asper Q9PVE3	PLA2
15	0.249	28 ▼		973.1	2	NPVTSYGAYGCNCGVLGR	66	B. asper Q9PVE3	PLA2
				401.8	2	AVAICLR	de novo	~ B. asper Q9PVE3	PLA2
	4.733	14 ▼	13711.6	401.8	2	AVAICLR	490	B. asper Q9PVE3	PLA2
				579.7	3	ELCECDKAVAICLR
				648.7	3	NPVTSYGAYGCNCGVLGR
				973.1	2	NPVTSYGAYGCNCGVLGR
				949.3	3	MILQETGKNPVTSYGAYGCNCGVLGR
				954.6	3	MoxILQETGKNPVTSYGAYGCNCGVLGR
				767.4	2	SYGAYGCNCGVLGR	293	B. pirajai 1QLL_A	PLA2
				780.4	3	TIVCGENNPCLKELCECDK
16	0.069	29 ▼		702.8	2	TIVCGENNPCLK	448	B. pirajai P82287	PLA2
				767.3	2	SYGAYGCNCGVLGR
				710.3	2	TIVCGEENPCLK	390	B. moojeni P82114	PLA2
				973.1	2	NPVTSYGAYGCNCGVLGR	290	B. asper Q9PVE3	PLA2
				954.5	3	MoxILQETGKNPVTSYGAYGCNCGVLGR
	1.31	15 ▼	13998.6	630.3	2	YMAYPDVLCK	395	B. jararacussu P45881	D49-PLA2
				638.3	2	YMoxAYPDVLCK
				502.5	3	CCFVHDCCYGK
				576.6	3	QICECDKAAAVCFR
				560.8	4	QICECDKAAAVCFRENLR
17	1.964	15 ▼	14025.6	502.5	3	CCFVHDCCYGK	217	B. pirajai 1GMZ_A	D49-PLA2
				753.8	2	CCFVHDCCYGK
				576.6	3	QICECDKAAAVCFR	211	B. jararacussuP45881	D49-PLA2
				560.8	4	QICECDKAAAVCFRENLR
				630.3	2	YMAYPDVLCK
18	0.284	46 ▼		510.3	2	DKDIMoxLIR	172	S. c. edwardsi ABG26970	SVSP
				652.8	2	NFQMoxQLGVHSK
				505	3	(572.4)CNXNEHR	de novo	~ P. jerdonii Q9DF67	SVSP
				584.85	3	(683.9)SDYTEGEXR	de novo	~ B. jararaca O13069	SVSP
	0.284	12 ▼	14026,6/13713,6/14025,5	430.2	2	KTDLLNR	89	B. insularis Q8QG89	PI-SVMP
				548.3	2	SCIMASVLSK	87	B. asper 1ND1_A	PI-SVMP
19	0.905	28 ▼		569.8	2	SVDFDSESPR	387	D. acutus ACE73576	CRISP
				581.3	2	SVNPTASNMLK
				769.4	2	MEWYPEAAANAER
				777.3	2	MoxEWYPEAAANAER
				635.7	3	KPEIQNEIVDLHNSLR
	0.075	23 ▼	24648.5	569.7	2	SVDFDSESPR	240	C. horridus ACE73560	CRISP
				589.3	2	SVNPTASNMoxLK
				777.3	2	MoxEWYPEAAANAER
				635.7	3	KPEIQNEIVDLHNSLR
	0.035	12 ▼	13526.6	777.4	2	MoxEWYPEAAANAER	177	G. blomhoffii Q8JI40	CRISP
				635.8	3	KPEIQNEIVDLHNSLR
	0.493	12 ▼		557.3	2	SCIMASTISK	131	B. pauloensis P0C6S0	PI-SVMP
				445.3	3	HNPQCIINQPI
20	0.191	28 ▼		569.8	2	SVDFDSESPR	291	C. horridus ACE73561	CRISP
				589.4	2	SVNPTASNMoxLK
				777.4	2	MoxEWYPEAAANAER
				631.7	3	QMoxQSDCSAICFCQNK
				635.8	3	KPEIQNEIVDLHNSLR
				771.5	2	CGENIYMoxSPVPMK	226	C. viridis ACE73566	CRISP
	0.062	28 ▼		412.8	2	VAATCFR	117	B. erythromelas Q2HZ28	D49-PLA2
				479.8	2	YWFFPAK
				502.6	3	CCFVHDCCYGK
	0.379	12 ▼	13423,2/13519,3/13697,6/13343,3	558.4	2	ENPQCILNK	98	B. insularis Q8QG89	PI- SVMP
				1090.1	2	YFSDCSYIQCWDFIMoxK
21	0.0643	31 ▼		444.8	2	FFCLSSK	160	B. jararacussuQ7T229	SVSP
				535.4	2	FLVALYTSR
				584.9	2	VSDYTEWIR
				505	3	VIGGDECNINEHR	154	G. halys AAC34898	SVSP
	1.093	14 ▼	13119,3/13637/13664/13698	413.3	2	VAATCFR	471	B. diporus AFJ79208	acidic D49-PLA2
				480.3	2	YWFFPAK
				490.7	2	QICECDR
				502.5	3	CCFVHDCCYGK
				595.9	3	QICECDRVAATCFR
				513.7	4	DNKDTYDNKYWFFPAK
				813.3	3	ADTYTYSEENGVVVCGGDDPCK
				997.4	3	SGVWYYGSYGCYCGSGGQGRPQDASDR
	0.114	10 ▼		412.8	2	VAATCFR	137	B. erythromelas Q2HZ28	D49-PLA2
				479.8	2	YWFFPAK
				502.6	3	CCFVHDCCYGK
	0.015	10 ▼		557.3	2	SCIMoxASTISK	131	B. insularis Q5XUW8	PII-SVMP (PI-SVMP)
				667.5	2	HNPQCIINQPI	129	B. pauloensis P0C6S0	PI-SVMP
22	0.216	54 ▼		797	2	TLCAGVLQGGIDTCK	103	T. albolabris A7LAC6	SVSP
				504.9	3	(388.2)DECNXNEHR	de novo	~ B. jararaca P81882	SVSP
				587.9	2	(200.2)PGEPAXYTK	de novo	~ B. jararaca Q9PTU8	SVSP
				424.9	3	WYPDVPHCAK	de novo	~ B. jararaca AAB34465	SVSP
	0.215	32 ▼		535.4	2	FLVALYTSR	133	B. jararacussuQ7T229	SVSP
				559.9	2	TLCAGILEGGK
				672.9	2	SIIAGNTDVTCPP
				404.3	3	INILDHAVCR	133	B. jararaca AAB34465	SVSP
				525.4	3	KDDVLDKDIMLIR
	1.511	30 ▼		535.4	2	FLVALYTSR	94	G. halys AAC34898	SVSP
				756.9	2	VIGGDECNINEHR
				505.3	3	VIGGDECNINEHR
				584.7	2	VSDYTEWIR	89	B. jararacussuQ7T229	SVSP
				603.9	2	IMoxGWGTISPTK
				644.9	2	NFQMQLGVHSK	79	B. asper Q072L6	SVSP
				559.4	2	TLCAGILKGGK	63	G. shedaoensis P0C5B4	SVSP
	0.11	14 ▼	13119,3/13665,9	480.3	2	YWFFPAK	202	B. diporus AFJ79208	acidic D49-PLA2
				502.5	3	CCFVHDCCYGK
				490.7	2	QICECDR
				997.6	3	SGVWYYGSYGCYCGSGGQGRPQDASDR
				468.3	2	MoxILQETGK	165	B. asper Q9PVE3	PLA2
				973.1	2	NPVTSYGAYGCNCGVLGR
				703.9	2	NGDIVCGGDDPCK	89	G. blomhoffii P04417	PLA2
				411.8	2	SLLEFGR	72	T. stejnegeri Q6H3C5	D49-PLA2
	0.089	14 ▼		584.9	2	VSDYTEWIR	64	B. jararacussu Q7T229	SVSP
	0.016	14 ▼		521.3	2	NAFLCQCK	63	B. jararacussu AAP42417	CTL
				621.3	2	DFSWEWTDR
				411.3	3	KVLNEDEQTR	59	S. c. edwardsi ABG26970	SVSP
				668.5	2	NLVQFKTLIMK	59	B. alternatus P86456	D49-PLA2
23	0.154	46 ▼		444.8	2	FFCLSSK	143	G. halys AAC34898	SVSP
				559.9	2	TLCAGILEGGK
				573.4	2	EKFFCLSSK
				505	3	VIGGDECNINEHR
				601.4	2	NVPNEDEQTR	107	O. okinavensis BAN82133	SVSP
				804	2	TLCAGILQGGIDTCK	106	M. lebetina E0Y419	SVSP
				797	2	TLCAGVLQGGIDTCK	96	T. albolabris A7LAC6	SVSP
				967.3	2	YFCLSSR	95	G. blomhoffii Q9PT51	SVSP
	0.019	46 ▼		412.8	2	VAATCFR	72	B. erythromelas Q2HZ28	PLA2
				479.8	2	YWFFPAK
	3.289	14 ▼	13649,9/13621	412.8	2	VAATCFR	188	B. diporus AFJ79208	acidic D49-PLA2
				479.8	2	YWFFPAK
				502.6	3	CCFVHDCCYGK
				513.8	4	DNKDTYDNKYWFFPAK
				855.5	3	ADTYTYSEENGVVVCGGDDPCK
				997.6	3	SGVWYYGSYGCYCGSGGQGRPQDASDR
24	0.513	46 ▼		797	2	TLCAGVLQGGIDTCK	197	T. albolabris A7LAC6	SVSP
				559.9	2	TLCAGILEGGK	64	P. mucrosquamatus AAB01070	SVSP
				588.4	2	AAYPELPATSR
				584.9	2	VSDYTEWIR	61	B. jararacussu Q7T229	SVSP
				559.4	2	SVANDDEVIR	57	B. jararaca P81661	SVSP
	0.411	34 ▼		559.4	2	TLCAGILEGGK	110	B. jararaca O13069	SVSP
				588.4	2	AAYPELPATSR
				595.4	2	WDKDIMLIR
				797	2	TLCAGVLQGGIDTCK	78	T. albolabris A7LAC6	SVSP
				502.7	3	SVANDDEVIRYPK	92	B. jararaca P81661	SVSP
				520.7	3	KNVITDKDIMLIR
	0.472	28 ▼		500.3	3	VVGGDECNINEHR	73	A. c. contortrix P82981	SVSP
				559.4	2	TLCAGILEGGK	65	B. jararaca O13069	SVSP
	0.103	21 ▼		559.4	2	TLCAGILEGGK	112	B. jararaca O13069	SVSP
				588.4	2	AAYPELPATSR
				797	2	TLCAGVLQGGIDTCK	88	T. albolabris A7LAC6	SVSP
	0.103	16 ▼		559.4	2	TLCAGILEGGK	102	B. jararaca O13069	SVSP
				588.4	2	AAYPELPATSR
				500.3	3	VIGGDEFNINEHR	76	A. bilineatus AAB26159	SVSP
				524.7	3	KNDVLDKDIMLIR	70	B. jararaca AAQ62580	SVSP
	0.099	14 ▼		621.4	2	DFSWEWTDR	125	C. atrox P21963	CTL
				639.9	2	LWNDQVCESK
				457.3	3	KDFSWEWTDR
	0.326	14 ▼	13649,9/13618,9	412.8	2	VAATCFR	119	B. erythromelas Q2HZ28	D49-PLA2
				479.8	2	YWFFPAK
				502.6	3	CCFVHDCCYGK
				411.3	2	SLLEFGR	98	T. stejnegeri Q6H3C5	D49-PLA2
	0.027	14 ▼		444.8	2	FFCLSSK	93	B. jararaca O13069	SVSP
				588.4	2	AAYPELPATSR
				418.8	2	VAAICFR	76	C. v. viridis Q7ZTA6	D49-PLA2
25	0.208	36 ▼		487.4	2	IYLGIHTR	227	B. jararaca P81661	SVSP
				559.4	2	SVANDDEVIR
				502.7	3	SVANDDEVIRYPK
				444.8	2	FFCLSSK	201	B. jararaca O13069	SVSP
				559.4	2	TLCAGILEGGK
				573.4	2	EKFFCLSSK
				588.4	2	AAYPELPATSR
				640.4	2	AAYPELPAEYR	142	B. jararaca Q5W959	SVSP
				765.5	3	TNPDVPHCANINLLDDAVCR
				505	3	VIGGDECNINEHR	96	G. halys AAC34898	SVSP
	<0,01	36 ▼		526.8	2	GNYYGYCR	69	B. jararaca P30431	PIII-SVMP
				579.4	2	KIPCAPEDVK
	0.21	31 ▼		404	3	INILNHAVCR	208	B. jararaca AAQ62580	SVSP
				487.7	3	NDVLDKDIMoxLIR
				525	3	KNDVLDKDIMLIR
				559.4	2	TLCAGILEGGK	112	B. jararaca O13069	SVSP
				588.4	2	AAYPELPATSR
	0.28	28 ▼		559.4	2	TLCAGILEGGK	68	B. jararaca O13069	SVSP
				588.4	2	AAYPELPATSR
				524.7	3	KNDVLDKDIMLIR	58	B. jararaca AAQ62580	SVSP
	0.532	14 ▼	14025,6/13665,8/17932,1/17640,2/13513,6/13649,9	621.4	2	DFSWEWTDR	110	L. stenophrys Q9PSM4	CTL
				1013.6	2	NNCPQDWLPMoxNGLCYK
	0.167	14 ▼		418.8	2	VAAICFR	72	C. v. viridis Q7ZTA6	D49-PLA2
				502.7	3	CCFVHDCCYGK
26	0.829	34 ▼		804.5	2	TLCAGILEGGIDTCK	70	P. jerdonii Q9DF68	SVSP
				487.7	3	NDVLDKDIMoxLIR		B. jararaca AAQ62580	SVSP
	2.487	16 ▼	14009.5	753.4	2	CCFVHDCCYGK	112	B. pirajai 1GMZ_A	D49-PLA2
				502.6	3	CCFVHDCCYGK
				576.7	3	EICECDKAAAVCFR
27	0.709	35 ▼		404	3	INILNHAVCR	143	B. jararaca AAQ62580	SVSP
				487.7	3	NDVLDKDIMoxLIR
				530.4	3	KNDVLDKDIMoxLIR
				559.9	2	TLCAGILEGGK	96	D. acutus AAK52506	SVSP
				826.6	3	VSNSEHIAPLSLPSSPPSVGSVCR	79	B. asper Q072L6	SVSP
	1.063	16 ▼	13923,6/14009,6	472.8	2	DAEMoxFCR	55	B. atrox P0DM53	CTL
				621.4	2	DFSWEWTDR
28	0.666	35 ▼		559.9	2	TLCAGILEGGK	153	A. c. contortrix P82981	SVSP
				500.3	3	VVGGDECNINEHR
				444.8	2	FFCLSSK	128	G. halys AAC34898	SVSP
				565.9	2	ILCAGILEGGK	122	G. brevicaudus Q9YGJ9	SVSP
				545.7	3	ILCAGILEGGKDTCK
				509.3	2	KFFCLSSK	118	S. c. edwardsi ABG26975	SVSP
				826.6	3	VSNSEHIAPLSLPSSPPSVGSVCR	91	B. asper Q072L6	SVSP
				530.4	3	KNDVLDKDIMoxLIR	65	B. jararaca AAQ62580	SVSP
	0.022	16 ▼	14009,6/13923,5/13649,9	548.8	2	ISHDHAQLLTTIVFDNYVIGITK	132	B. neuwiedi ADO21511	PII-SVMP (PI-SVMP)
	0.311	16 ▼		479.8	2	YWFFPAK	74	B. erythromelas Q2HZ28	PLA2
				411.8	2	SLLEFGR	60	T. stejnegeri Q6H3C5	PLA2
	0.666	10 ▼		610.9	2	HNPQCILNKP	131	B. leucurus P84907	PI-SVMP
				1208.8	2	GLSFEFSDCSQNQYQTYLTK
				667.5	2	HNPQCILNKPL	86	B. jararacussu ABP48735	PI-SVMP
29	0.108	28 ▼		791.5	2	CANXNXXDYAVCR	de novo	~ B. alternatus P0CG03	SVSP
	0.893	28 ▼		852.6	2	SVDADASXANXEVWSK	de novo	~ B. insularis Q5XUW8	PII-SVMP (PI-SVMP)
				548.4	2	SCXMASVTVK	de novo	~ B. asper 1ND1_A	PI-SVMP
				808.8	3	(459.3)VFSDCSQNQYQTFXTK	de novo	~ B. moojeni 3GBO_A	PI-SVMP
30	0.449	64 ▼		423.3	2	LTTLGVNK	974	P. flavoviridis BAN82018	5'-NT
				476.3	2	VGIIGYTTK
				654	2	QVPVVQAYAFGK
				476	3	DEVEELQNHANK
				725.5	2	VVSLNVLCTECR
				777.5	2	HGQGMGELLQVSGIK
				519.4	3	IIALGHSGFLEDQR
				526.7	3	HANFPILSANIRPK
				860	2	ETPVLSNPGPYLEFR
				640.4	3	LLLPSFLAAGGDGYHMoxLK
				807.8	3	FHECNLGNLICDAVIYNNVR
				606.6	3	HPDDNEWNHVSMoxCIVNGGGIR
				868.6	3	YDAMoxALGNHEFDNGLAGLLDPLLK
				782.2	4	ETPVLSNPGPYLEFRDEVEELQNHANK
				521.9	2	SSGNPILLNK	850	C. adamanteus AEJ31979	5'-NT
				672.4	2	CTGQDCYGGVAR
				635.8	3	LLLPSFLAGGGDGYHMoxLK	767	G. brevicaudus B6EWW8	5'-NT
	<0,01	64 ▼		442.3	2	IFLTCTK	268	B. pauloensis B5AR80	LAO
				613.9	2	EVTVTYQTSAK
				676.9	2	SAGQLYEESLQK
				743.9	2	ETDYEEFLEIAK
	0.463	57 ▼		438.8	2	STTDLPSR	687	B. pauloensis B5AR80	LAO
				442.3	2	IFLTCTK
				563.8	2	FDEIVGGMoxDK
				569.3	2	HDDIFAYEK
				613.9	2	EVTVTYQTSAK
				642	2	RFDEIVGGMoxDK
				655.4	2	EGWYANLGPMoxR
				676.9	2	SAGQLYEESLQK
				744	2	ETDYEEFLEIAK
				551	3	NDKEGWYANLGPMR
				585.9	4	VGEVNKDPGVLEYPVKPSEVGK
				532.8	2	NPLEECFR	590	B. moojeni Q6TGQ8	LAO
				757.9	2	ETDYEEFLEIAR	491	G. blomhoffii Q90W54	LAO
	0.08	57 ▼		654	2	QVPVVQAYAFGK	446	P. flavoviridis BAN82018	5'-NT
				519.4	3	IIALGHSGFLEDQR
				860.1	2	ETPVLSNPGPYLEFR
				807.8	3	FHECNLGNLICDAVIYNNVR
				521.9	2	SSGNPILLNK	403	G. brevicaudus B6EWW8	5'-NT
				635.8	3	LLLPSFLAGGGDGYHMoxLK
				1016.6	2	LNEFSQENENAWYFIK	290	C. adamanteus O93364	LAO
				508	3	ADDRNPLEECFR	214	B. leucurus P0DI89	LAO
	0.176	45 ▼		442.3	2	IFLTCTK	558	B. pauloensis B5AR80	LAO
				569.3	2	HDDIFAYEK
				613.9	2	EVTVTYQTSAK
				655.4	2	EGWYANLGPMoxR
				676.9	2	SAGQLYEESLQK
				744	2	ETDYEEFLEIAK
				572	3	DPGVLEYPVKPSEVGK
				585.9	4	VGEVNKDPGVLEYPVKPSEVGK
	0.186	45 ▼		423.3	2	LTTLGVNK	496	P. flavoviridis BAN82018	5'-NT
				476.8	2	VGIIGYTTK
				654	2	QVPVVQAYAFGK
				725.5	2	VVSLNVLCTECR
				519.4	3	IIALGHSGFLEDQR
				860	2	ETPVLSNPGPYLEFR
				640.4	3	LLLPSFLAAGGDGYHMoxLK
				807.8	3	FHECNLGNLICDAVIYNNVR
				630.4	3	LLLPSFLAGGGDGYHMLK	444	G. brevicaudus B6EWW8	5'-NT
				1016.6	2	LNEFSQENENAWYFIK	228	C. adamanteus O93364	LAO
				508	3	ADDRNPLEECFR	118	B. leucurus P0DI89	LAO
	0.135	39 ▼		441.8	2	IFLTCTK	602	B. pauloensis B5AR80	LAO
				563.9	2	FDEIVGGMoxDK
				569.3	2	HDDIFAYEK
				613.9	2	EVTVTYQTSAK
				647.4	2	EGWYANLGPMR
				676.9	2	SAGQLYEESLQK
				744	2	ETDYEEFLEIAK
				551	3	NDKEGWYANLGPMR
				780.9	3	VGEVNKDPGVLEYPVKPSEVGK
				572.1	3	DPGVLEYPVKPSEVGK
	0.318	39 ▼		423.3	2	LTTLGVNK	326	P. flavoviridis BAN82018	5'-NT
				524.8	2	DISEDQDVK
				654	2	QVPVVQAYAFGK
				725.5	2	VVSLNVLCTECR
				860	2	ETPVLSNPGPYLEFR
				640.4	3	LLLPSFLAAGGDGYHMoxLK
				521.9	2	SSGNPILLNK	321	G. brevicaudus B6EWW8	5'-NT
				1016.6	2	LNEFSQENENAWYFIK	238	C. adamanteus O93364	LAO
				508	3	ADDRNPLEECFR	152	B. leucurus P0DI89	LAO
31	0.343	>66▼		441.7	2	IFLTCTK	384	B. pauloensis B5AR80	LAO
				563.8	2	FDEIVGGMoxDK
				569.3	2	HDDIFAYEK
				676.8	2	SAGQLYEESLQK
				743.8	2	ETDYEEFLEIAK
				757.7	3	IYFAGEYTAQAHGWIDSTIK
				1002.9	3	YAMoxGGITTFTPYQFQHFSEALTAPVGR	182	P. flavoviridis BAN82013	LAO
	0.111	66 ▼		438.7	2	STTDLPSR	376	B. pauloensis B5AR80	LAO
				613.8	2	EVTVTYQTSAK
				676.8	2	SAGQLYEESLQK
				744.3	2	ETDYEEFLEIAK
				589.3	3	EEIQAFCRPSMIQR
	0.14	66 ▼		561.8	2	NPFYTPSPAK	268	C. adamanteus J3SBP3	PDE
				583.8	2	QPLPETLQLK
				678.3	2	AATYFWPGSEVK
				771	3	NPAWWGGQPIWHTATYQGLK
	0.092	66 ▼		610.8	2	VTLDLFGNWR	64	T. gracilis AEH59577	PIII-SVMP
	3.335	55 ▼		555.8	2	FDEIVGGMDK	464	B. pauloensis B5AR80	LAO
				569.3	2	HDDIFAYEK
				655.4	2	EGWYANLGPMoxR
				676.9	2	SAGQLYEESLQK
				744	2	ETDYEEFLEIAK
				551	3	NDKEGWYANLGPMR
				757.8	3	IYFAGEYTAQAHGWIDSTIK
				780.9	3	VGEVNKDPGVLEYPVKPSEVGK
				569.3	2	HDDIFAYEK	270	P. flavoviridis BAN82013	LAO
				655.4	2	EGWYANLGPMoxR
				551	3	NDKEGWYANLGPMR
				997.6	3	YAMGGITTFTPYQFQHFSEALTAPVGR
	0.095	55 ▼		653.9	2	QVPVVQAYAFGK	64	P. flavoviridis BAN82018	5'-NT
				519.4	3	IIALGHSGFLEDQR
	0.939	42 ▼		563.8	2	FDEIVGGMoxDK	267	B. pauloensis B5AR80	LAO
				569.4	2	HDDIFAYEK
				655.4	2	EGWYANLGPMoxR
				677	2	SAGQLYEESLQK
				613.9	2	EVTVTYQTSAK
				642	2	RFDEIVGGMoxDK
				744	2	ETDYEEFLEIAK
				1016.6	3	YAMGGITTFTPYQFQHFSEALTAPVDR
				630.9	2	FWEDDGIHGGK	121	C. adamanteus O93364	LAO
				1016.6	2	LNEFSQENENAWYFIK
				508	3	ADDRNPLEECFR	102	B. leucurus P0DI89	LAO
	1.805	42 ▼		610.9	2	VTLDLFGNWR	85	T. gracilis AEH59577	PIII-SVMP
				690.4	2	ACSNGQCVDVNR	82	G. halys Q8AWI5	PIII-SVMP
32	0.509	>66▼		438.7	2	STTDLPSR	875	B. pauloensis B5AR80	LAO
				569.3	2	HDDIFAYEK
				613.8	2	EVTVTYQTSAK
				676.8	2	SAGQLYEESLQK
				704.8	2	LPTSMYQAIQEK
				743.8	2	ETDYEEFLEIAK
				589	3	EEIQAFCRPSMIQR
				757.7	3	IYFAGEYTAQAHGWIDSTIK
	0.117	>66▼		719.8	2	TVAPDGCFDSNQK	152	B. jararacussu AAP78951	PIII-SVMP
				656.4	3	YLIDNRPPCILNIPLR
	0.091	>66▼		583.8	2	QPLPETLQLK	140	O. okinavensis BAN89425	PDE
	1.331	66▼		419.7	2	IQIHTAR	751	C. adamanteus J3SBP3	PDE
				547.3	2	TLGMLMEGLK
				561.3	2	NPFYTPSPAK
				631.4	2	TFLPIFVNPVN
				678.3	2	AATYFWPGSEVK
				795.4	2	VNLMVDQQWMAVR
				834.9	2	DVELLTGLNFYSGLK
				649.3	3	IDKVNLMVDQQWMAVR
				771	3	NPAWWGGQPIWHTATYQGLK
				778.4	3	EQSSPLSCPFGPVPSPDVSGCK
				919.4	2	AGYLESWDSLMPNINK	650	O. okinavensis BAN89425	PDE
	0.034	66▼		569.3	2	HDDIFAYEK	167	B. pauloensis B5AR80	LAO
				676.8	2	SAGQLYEESLQK
				757.8	2	ETDYEEFLEIAR	125	V. a. ammodytes 3KVE_A	LAO
	0.172	66▼		656.4	3	YLIDNRPPCILNIPLR	116	B. jararacussu AAP78951	PIII-SVMP
	0.855	64 ▼		676.9	2	SAGQLYEESLQK	134	B. pauloensis B5AR80	LAO
				705	2	LPTSMYQAIQEK
				744	2	ETDYEEFLEIAK
				705.5	2	LPTSMYQAIKEK	117	L. muta J7H670	LAO
				756	2	ETDYEEFLEIAR	114	P. flavoviridis P0C2D5	LAO
				508	3	ADDRNPLEECFR
	0.169	64 ▼		656.5	3	YLIDNRPPCILNIPLR	85	B. jararacussu AAP78951	PIII-SVMP
				992.5	2	LTPGSQCADGVCCDQCR	67	B. neuwiedi ADO21510	PII-SVMP
	4.098	55 ▼		900.2	3	SECDIAESCTGQSPECPTDDFHR	65	B. jararacussu AAP78951	PIII-SVMP
	0.163	40 ▼		438.8	2	STTDLPSR	286	B. pauloensis B5AR80	LAO
				569.3	2	HDDIFAYEK
				744	2	ETDYEEFLEIAK
				1022.4	3	YAMoxGGITTFTPYQFQHFSEALTAPVDR
	1.067	40▼		688.4	2	NDPDIGMVDLGTK	165	B. jararacussu AAP78951	PIII-SVMP
				719.9	2	TVAPDGCFDSNQK
				656.5	3	YLIDNRPPCILNIPLR
	0.307	40 ▼		597.9	2	TPVPAGCYDSK	153	C. adamanteus F8S101	PLB
				666.9	2	VVPESLFAWER
				479.6	3	HGLEFSYEMAPR
				853.1	2	SLEDGTLYIIEQVPK
				741.5	3	HQGLPESYNFDFVTMKPVL
				999.5	2	LTPGSQCADGLCCDQCR	83	B. jararaca Q0NZY0	PIII-SVMP
				611	2	VTLDLFGNWR	76	T. gracilis AEH59577	PIII-SVMP
	0.307	32 ▼		547.8	2	YNSNLNTIR	141	B. jararacussu Q7T1T4	PI-SVMP
				554.3	3	SFGEWRERDLLPR
	1.024	29 ▼		540.8	2	YNSNVNTIR	89	B. neuwiedi ADO21505	PI-SVMP
				847.6	2	YIELAVVADHGMFTK
				610.8	2	VTLDLFGNWR	63	T. gracilis AEH59577	PIII-SVMP (PI-SVMP)
	2.049	26 ▼		547.9	2	YNSNLNTIR	75	B. asper Q072L5	PII-SVMP (PI-SVMP)
				548.9	2	TLTSFGEWR
33	0.268	40 ▼		676.8	2	SAGQLYEESLQK	131	B. moojeni Q6TGQ8	LAO
				743.8	2	ETDYEEFLEIAK
	0.103	40 ▼		769.4	2	NPVFPVYFLNTAR	128	M. fulvius AFE84759	QC
				515	3	GVPILHLIPSPFPR
				771.9	2	GVPILHLIPSPFPR
				555.3	3	MWQNDLHPILIER
	1.37	40 ▼		1006.4	2	LTPGSQCAEGLCCDQCR	90	P. flavoviridis P23323	DC
				1013.4	2	LTPGSQCAEGLCCEQCR	86	T. stejnegeri P0DM87	PII-SVMP
				567	3	YVEFVVVLDHGMYK	82	B. erythromelas Q8UVG0	PIII-SVMP (PII-SVMP)
				609.7	3	KYVEFVVVLDHGMYK
				489.5	4	KYVEFVVVLDHGMYKK
				999.4	2	LTPGSQCADGLCCDQCR	76	B. jararaca Q0NZY0	PIII-SVMP (PII-SVMP)
				646.2	3	GDEPDDCCNGISADCPR	69	B. neuwiedi ADO21506	PII-SVMP
	0.836	26 ▼		540.9	2	YNSNVNTIR	119	B. neuwiedi ADO21505	PI-SVMP
				548.9	2	TLTSFGEWR
				549.3	2	SCIMASTISK
				570.7	3	YIELAVVADHGMoxFTK
				618.4	3	TWVHEMoxVNSLNGFFR
34	2.201	26 ▼		548.9	2	TLTSFGEWR	65	B. leucurus P84907	PI-SVMP
				461.3	3	TLTSFGEWRER
	0.122	23 ∎/10 ▼		540.9	2	YNSNVNTIR	329	B. neuwiedi ADO21505	PI-SVMP
				548.9	2	TLTSFGEWR
				549.3	2	SCIMASTISK
				565.4	3	YIELAVVADHGMFTK
				618.4	3	TWVHEMoxVNSLNGFFR
				557.4	2	SCIMoxASTISK
				847.6	2	YIELAVVADHGMFTK
				904.6	2	SMoxNVDASLVNLEVWSK
				919.1	2	TWVHEMVNSLNGFFR
				1201.7	2	GLSFEFSDCSQNQYQTYVTK
				610.9	2	HNPQCILNKP	178	B. leucurus P84907	PI-SVMP
				430.3	2	KTDLLNR	167	B. insularis Q8QG89	PI-SVMP
				558.9	2	ENPQCILNK
				1146.2	2	DMoxINVQPAAPQTLDSFGEWR
	0.122	6 ▼		547.9	2	YNSNLNTIR	83	B. neuwiedi ADO21504	PI-SVMP
				557.4	2	SCIMoxASTISK
35	1.102	26 ▼		764.5	3	DMoxINVQPAAPQTLDSFGEWR	87	B. insularis Q8QG89	PI-SVMP
				778.2	3	(758.6)PAAPQTXDSFGEWR	de novo	~ B. atrox P85420	PI-SVMP
				563.5	4	(941.3)DHEXGHNXGXR	de novo	~ B. marajoensis P86802	PI-SVMP
	0.061	12 ▼		764.5	3	DMoxINVQPAAPQTLDSFGEWR	108	B. insularis Q8QG89	PI- SVMP
				555.9	2	TXDSFWWR	de novo	~ P. elegans BAP39941	SVMP
				590.4	2	YNGNSDBXXR	de novo	~ B. insularis Q8QG89	PI-SVMP
	0.061	6 ▼		548.9	2	TLTSFGEWR	55	B. jararaca P0C7A9	SVMP
36	2.506	26 ▼		1138.2	2	DMINVQPAAPQTLDSFGEWR	248	B. insularis Q8QG89	PI-SVMP
				558.9	2	ENPQCILNK
				801.9	3	DMINVQPAAPQTLDSFGEWRK
				548.9	2	TLTSFGEWR	104	B. leucurus P84907	PI-SVMP
				579.4	3	VAVTMAHELGHNLGMR
				548.9	2	TLTSFGEWR	77	B. neuwiedi ADO21505	PI-SVMP
				613.1	3	TWVHEMVNSLNGFFR
	0.037	12 ▼		430.4	2	KTDLLNR	140	B. insularis Q8QG89	PI-SVMP
				764.2	3	DMoxINVQPAAPQTLDSFGEWR
	0.102	12 ▼		768	2	VFTEPQNWADAEK	73	B. jararaca AAB27577	CTL
	0.139	6 ▼		540.9	2	YNSNVNTIR	167	B. neuwiedi ADO21505	PI-SVMP
				548.9	2	TLTSFGEWR
				570.8	3	YIELAVVADHGMoxFTK
				613.1	3	TWVHEMVNSLNGFFR
				927.1	2	TWVHEMoxVNSLNGFFR
				548.9	2	TLTSFGEWR	63	B. leucurus P84907	PI-SVMP
				579.4	3	VAVTMAHELGHNLGMR
37	0.171	48 ▼		677	2	SAGQLYEESLQK	41	B. jararacussu Q6TGQ9	LAO
	1.32	48 ▼		607.9	2	(259.1)VVTPEQQR	de novo	~ G. saxatilis AAP20642	PIII-SVMP
	1.492	7 ▼		759.2	3	DMINVQPAAPQTLDSFGEWR	130	B. insularis Q8QG89	PI-SVMP
38	8.908	>66 ∎ /48 ▼		468	3	IPCAPEDVKCGR	74	B. jararaca P30431	PIII-SVMP
				510.7	3	KIPCAPEDVKCGR
				718.8	3	ITVKPDVDYTLNSFAEWR
				806.6	2	MYELANIVNEIFR
				711.4	3	SGSQCGHGDCCEQCKFSK
	1.351	34 ▼		578.9	2	KIPCAPEDVK	550	B. jararaca P30431	PIII-SVMP
				814.7	2	MoxYELANIVNEIFR
				1077.7	2	ITVKPDVDYTLNSFAEWR
				871.1	2	YVELFIVVDQGMVTK	300	B. jararaca 3DSL_B	PIII-SVMP
				718.7	3	ITVKPDVDYTLNSFAEWR
				499.4	3	QKPQCILNEPLR	135	B. neuwiedi ADO21501	PIII-SVMP
				797.1	2	IYEIVNNVNVIFR
				642.1	3	KSECDFDYSVDPDYGMVDHGTK
	0.297	20 ▼		508.9	2	NNGDLDKIK	359	B. jararaca P30431	PIII-SVMP
				514.8	2	IPCAPEDVK
				526.7	2	GNYYGYCR
				578.9	2	KIPCAPEDVK
				777	2	VCSNGHCVDVATAY
				814.6	2	MoxYELANIVNEIFR
		>66 ∎ / 20 ▼		871.1	2	YVELFIVVDQGMVTK	316	B. jararaca O93523	PIII-SVMP
				711.4	3	SGSQCGHGDCCEQCKFSK
				718.8	3	ITVKPDVDYTLNSFAEWR
	1.054	20 ▼		579	3	DTPFECPSDWSTHR	64	B. jararaca AAB36081	CTL
